# Supplementary material
Source: PubMed Central journal article supplement (PMC10268529)
Supplement: 13073_2023_1194_MOESM1_ESM.pdf [file 13073_2023_1194_MOESM1_ESM.pdf]

**Table S1.** Additional examples of disease-associated variations resolved by LRS.

| Variant Class                  | Associated Disease                                  | Long-Read Sequencing Technology | Previous Approaches                     | Details                                                                                                                | Citation |
|--------------------------------|-----------------------------------------------------|---------------------------------|-----------------------------------------|------------------------------------------------------------------------------------------------------------------------|----------|
| Single-nucleotide variant      | Meckel-Gruber syndrome                              | T-LRS ONT                       | T-SRS                                   | Identification of SNVs and characterization of a gene conversion event                                                 | (12)     |
| Trinucleotide repeat expansion | Myotonic Dystrophy Type 1                           | T-LRS HiFi                      | -                                       | Multiplex sequencing assay of amplicons containing a trinucleotide repeat expansion                                    | (26)     |
| Structural variations          | Acute myeloid leukemia                              | ONT WGS                         | Karyotyping, RNA-sequencing             | Breakpoint characterization of a previously identified translocation and characterization of an inferred translocation | (129)    |
|                                | Usher syndrome Type 1                               | ONT WGS, T-LRS ONT              | T-SRS                                   | Identification and characterization of a large pathogenic inversion                                                    | (11)     |
|                                | Different Mendelian conditions                      | T-LRS ONT                       | Karyotyping, microarrays, T-SRS, SR WGS | Identification and characterization of pathogenic SVs                                                                  | (15)     |
|                                | Neurodevelopmental disorders                        | HiFi WGS                        | SR WGS                                  | Identification of large, complex, likely pathogenic SVs                                                                | (14)     |
|                                | Hereditary cancer                                   | T-LRS ONT                       | T-SRS                                   | Characterization of mobile element insertions                                                                          | (130)    |
|                                | Intellectual disability                             | HiFi WGS                        | ES                                      | Identification of a pathogenic inversion                                                                               | (16)     |
|                                | Breast cancer                                       | T-LRS HiFi                      | -                                       | Characterization of <i>BRCA1/2</i> loci and identification of a novel SINE-VNTR-Alu retrotransposon insertion          | (63)     |
|                                | Muscular dystrophy                                  | ONT WGS                         | ES                                      | Identification of pathogenic SVs and SNVs                                                                              | (23)     |
|                                | Microphthalmia, anophthalmia, and coloboma spectrum | ONT WGS                         | ES, microarrays                         | Characterization of a complex chromosomal rearrangement                                                                | (24)     |
